# Supplementary material for: Subthreshold repetitive transcranial magnetic stimulation drives structural synaptic plasticity in the young and aged motor cortex
Source: bioRxiv or medRxiv preprint supplement (doi:10.1101/2021.03.10.434706), 2021-08-20
Supplement: Supplementary file [file media-1.pdf]

1 **Low intensity repetitive transcranial magnetic stimulation drives**  
2 **structural synaptic plasticity in the young and aged motor cortex.**

3

4 **Supplementary Material**

5 **Pooled analysis**

6 Given that the pooled analysis showed strong evidence for a change to the rate of  
7 spine gains at +21hrs post a single stimulation, that was not evident in the single or  
8 multiple stimulation analysis alone, further analysis was conducted to determine  
9 whether this result was being driven by data from a particular stimulation group  
10 (single or multiple stimulation). We ran 3 models, Model 1 with an interaction term  
11 between stimulation group and imaging timepoints, Model 2 with stimulation group  
12 as a main effect and Model 3 that does not account for any effect of stimulation.  
13 Comparison between Models 1 and 2 did not show strong evidence for an interaction  
14 effect (BF=1.05), suggesting no difference in the change of the rate of dendritic spine  
15 over the imaging timepoints between the single and multiple stimulation groups.  
16 Similarly, a comparison between Models 2 and 3 did not show strong evidence for a  
17 difference between stimulation groups (BF=0.19), suggesting no difference in the  
18 data-generating process between the two stimulation groups.

19

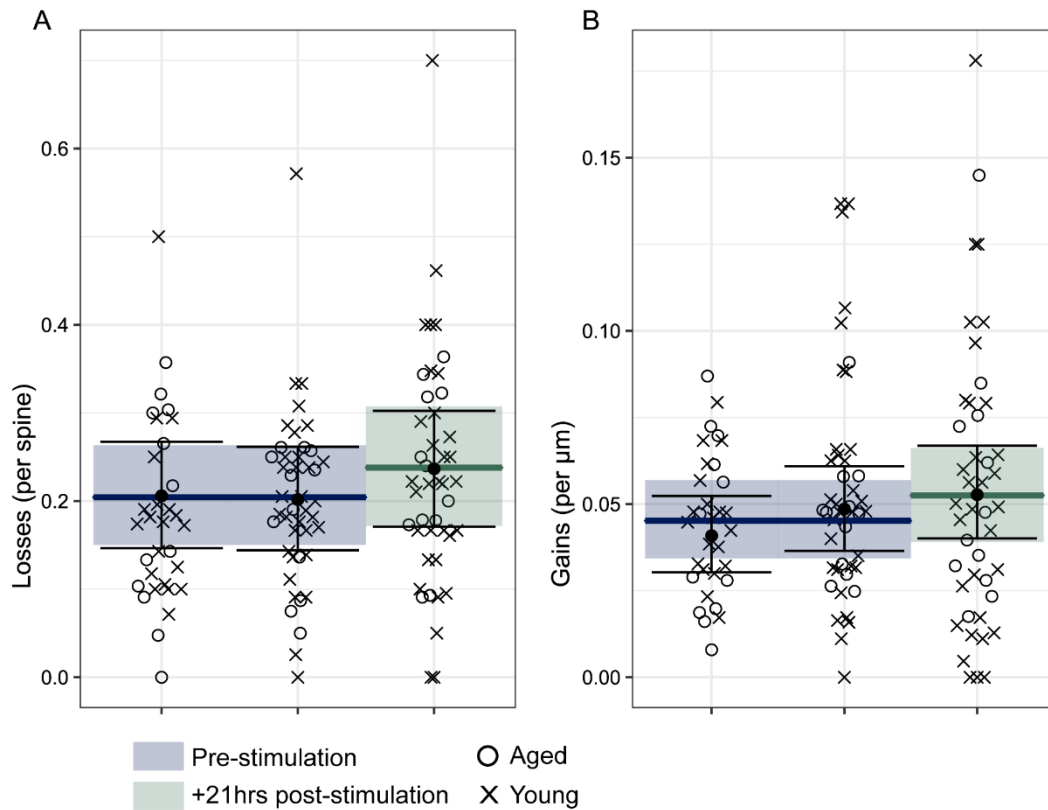

20

21 **Figure S1. Pooled analysis further suggests that a single session of LI-rTMS**  
 22 **drives structural synaptic plasticity in the motor cortex.**

23 (a) Pooled analysis of dendritic spine losses shows strong evidence for an increase  
 24 in the rate of spine losses +21hrs post a single stimulation.

25 (b) Pooled analysis of dendritic spine gains shows strong evidence for an increase in  
 26 the rate of spine gains +21hrs post a single stimulation.

27 Data are shown as the aggregate means (solid-coloured lines) for each time period  
 28 (pre-stimulation=blue, +21hrs post-stimulation=green) alongside the mean (•) at  
 29 each imaging observation. Error bars represent the 95% **credible intervals** for each  
 30 individual time point, whereas the shaded boxes represent the average 95% credible  
 31 intervals for each time period. Each data point represents data from an individual  
 32 dendritic arbour with data from young (o) and aged (x) animals.

33
